# Supplementary material
Source: publisher site journal article supplement (https://www.spandidos-publications.com/3504/downloadSupplementary)
Supplement: Supplementary file 1 [file downloadSupplementary]

Figure S1. Immunohistochemistry of surgical specimen showing HER2 overexpression (3+); magnification, x20.

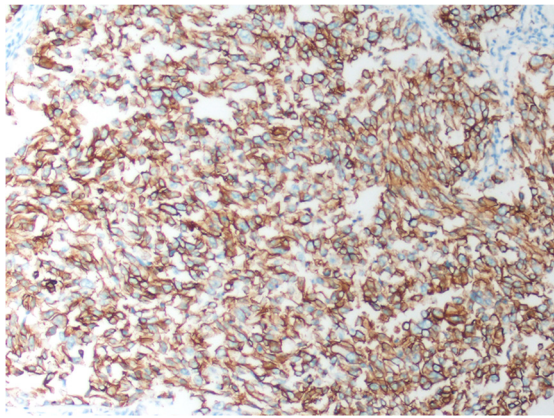

Table SI. Treatment regimen summary.

| Line | Regimen                           | Cycles, no. | Best response       | Time to progression (months) |
|------|-----------------------------------|-------------|---------------------|------------------------------|
| 1    | Surgery                           | 1           | Progressive disease | 2                            |
|      | Pemetrexed + platinum             | 2           |                     |                              |
| 2    | Abraxane + platinum + bevacizumab | 1           | Progressive disease | 1                            |
| 3    | Chemotherapy + lapatinib          | 5           | Partial response    | 5                            |
|      | Chemotherapy + trastuzumab        | 1           |                     |                              |
| 4    | Chemotherapy + pyrotinib          | 2           | Complete response   | 6                            |
|      | Pyrotinib                         | 4           |                     |                              |
| 5    | Afatinib                          | 1           | Progressive disease | 1                            |
| 6    | Pyrotinib                         | 1           | Progressive disease | 1                            |
| 7    | Pyrotinib + anlotinib + nivolumab | 6           | Stable disease      | 6                            |
